# Supplementary material for: A Reliable Approach for Revealing Molecular Targets in Secondary Ion Mass Spectrometry
Source: MDPI journal article supplement (doi:10.3390/ijms23094615), 2022-04-21
Supplement: s1 [file s1]

# A reliable approach for revealing molecular targets in secondary ion mass spectrometry

Fengxia Li <sup>1,2,\*</sup>, Eugenio F. Fornasiero <sup>1,2</sup>, Tal M. Dankovich <sup>1,3</sup>, Verena Kluever <sup>1</sup>, and Silvio O. Rizzoli <sup>1,2,\*</sup>

<sup>1</sup> Center for Biostructural Imaging of Neurodegeneration, University Medical Center Göttingen, von-Siebold-Straße 3a, 37075 Göttingen, Germany

<sup>2</sup> Department of Neuro- and Sensory Physiology, University Medical Center Göttingen, Humboldtallee 23, 37073 Göttingen, Germany

<sup>3</sup> International Max Planck Research School for Neuroscience, Göttingen, Germany

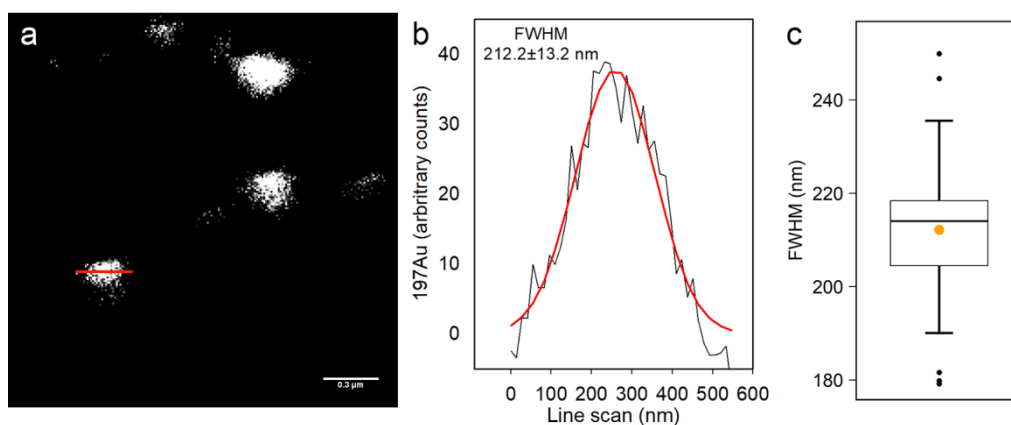

**Figure S1.** Au standard imaged in nanoSIMS. (a) A representative image of gold spots measured by nanoSIMS; (b) Line scan and fitted Gaussian curve of the gold counts from the red line indicated in (a); (c) Boxplot of FWHM based spatial resolution calculated for multiple detected gold spots ( $N = 64$ ).

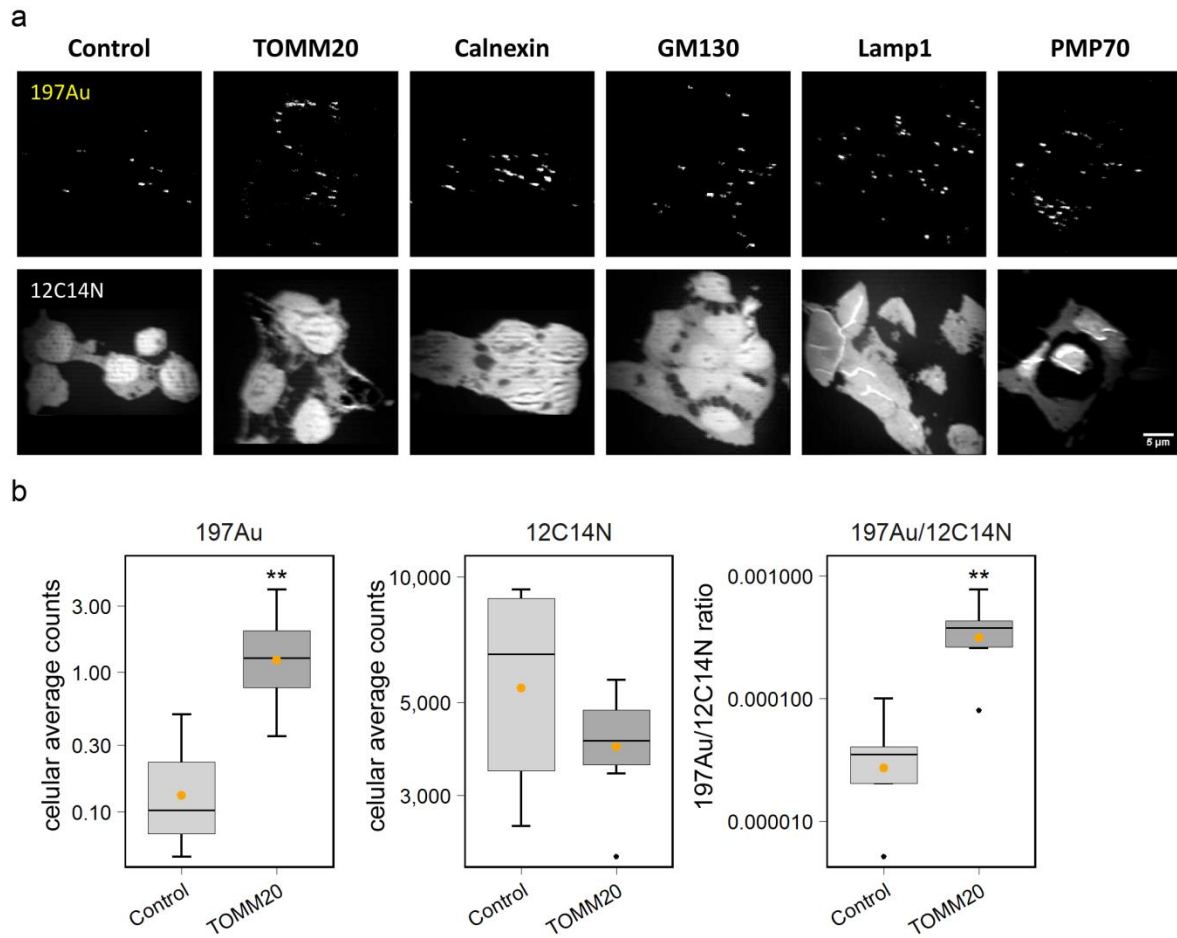

**Figure S2.** NanoSIMS measurement of 15nm Au\_Np labelled HEK293 organelle markers. (a) Representative images of each organelle marker labelling and control staining without primary antibody application; (b) Labelling intensity comparison for TOMM20 stained with 15 nm Au\_Np. Wilcoxon rank sum test; N=5 and 7 for control and TOMM20, respectively;  $p=0.0051$ ,  $0.34$  and  $0.0051$  for  $^{197}\text{Au}$ ,  $^{12}\text{C}^{14}\text{N}$  and  $^{197}\text{Au}/^{12}\text{C}^{14}\text{N}$ , respectively.

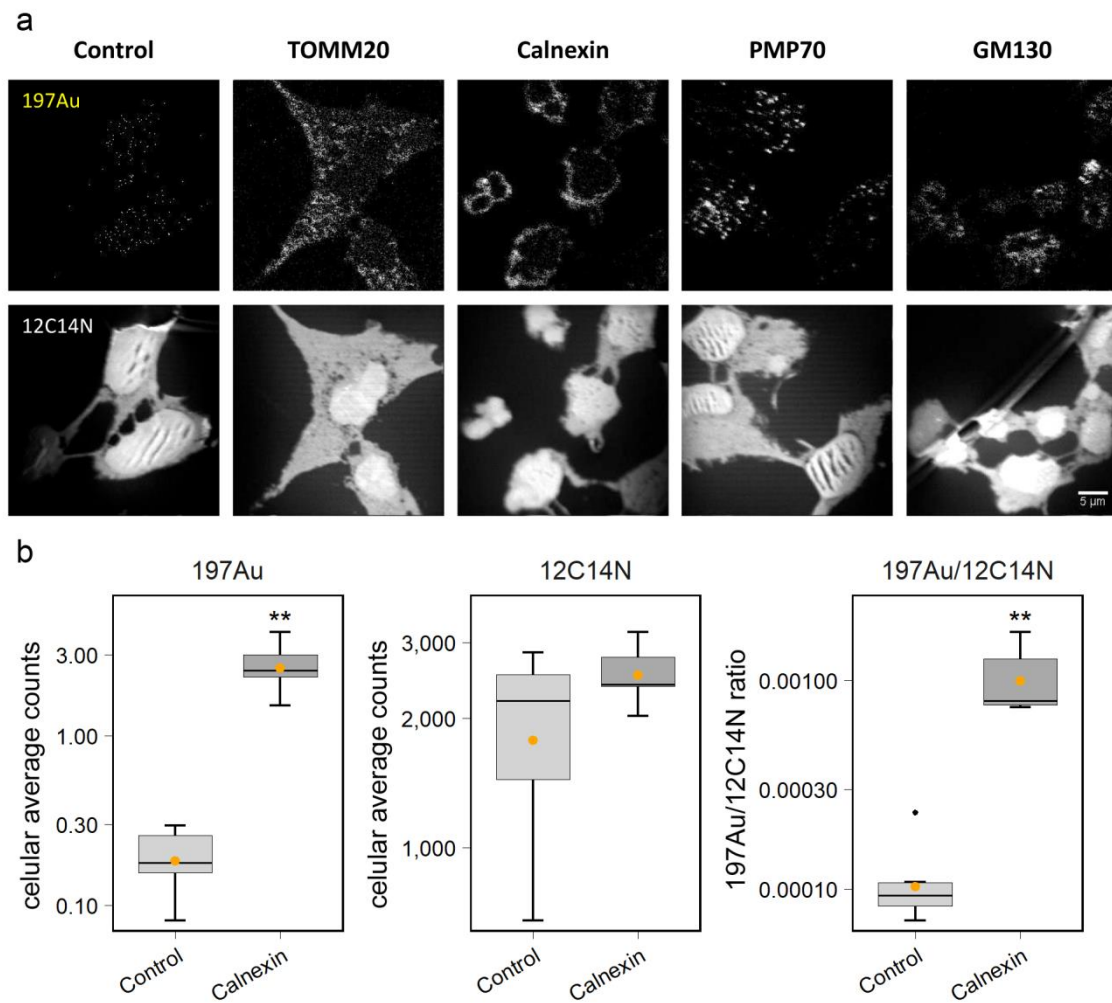

**Figure S3.** NanoSIMS measurement of 1.4nm Au<sub>Np</sub> labelled HEK293 organelle markers. (a) Representative images of each organelle marker labelling and control staining without primary antibody application; (b) Labelling intensity comparison for calnexin staining stained with 1.4 nm Au<sub>Np</sub>. Wilcoxon rank sum test; N=7 and 5 for control and calnexin, respectively; p=0.0025, 0.2 and 0.0025 for 197Au, 12C14N and 197Au/12C14N, respectively.

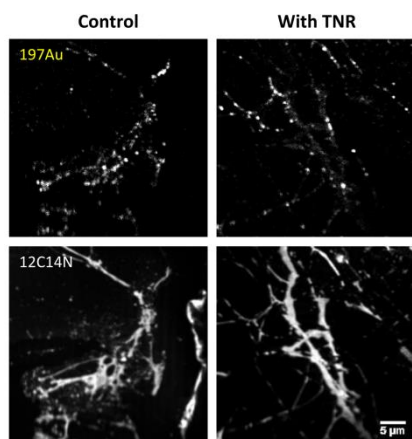

**Figure S4.** NanoSIMS measurement of 5 nm Ni-NTA-Nanogold lively labelled neuronal cultures detected strong gold signal both in control samples with only gold probe applied and in samples with mixture of His-tagged TNR and gold probe applied.

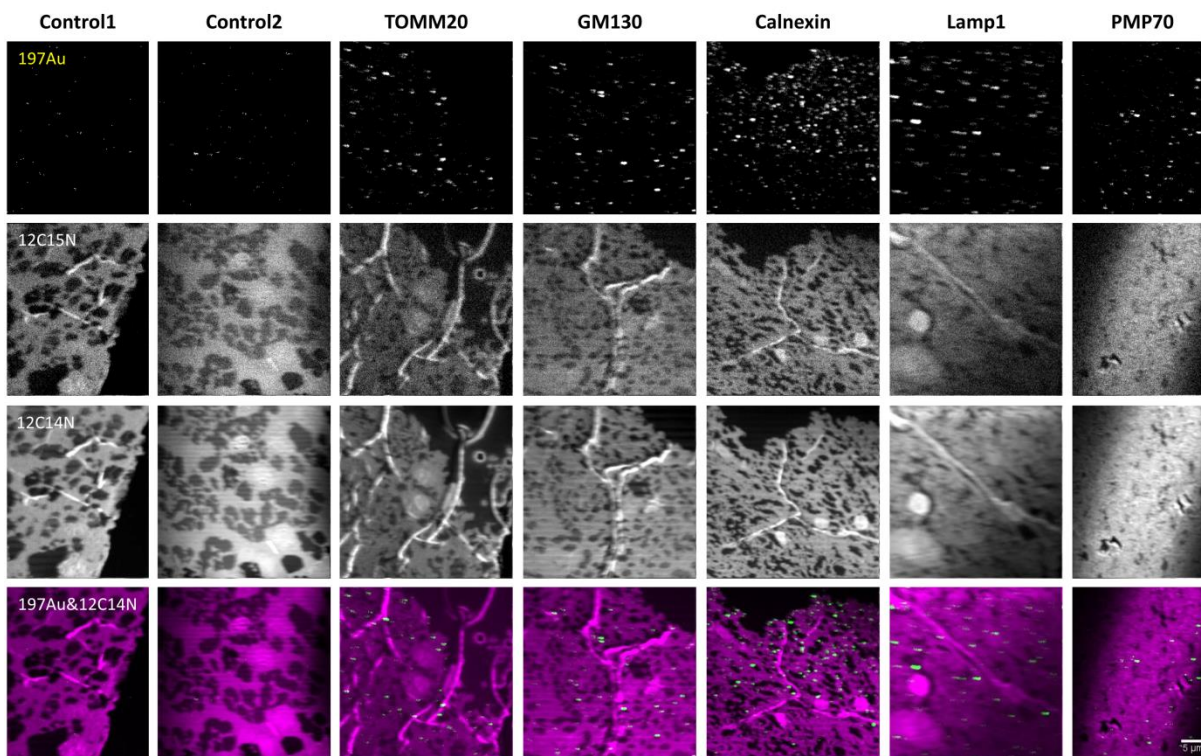

**Figure S5.** NanoSIMS detection of organelle markers in mouse brain slices tagged by 6 nm Au\_Np. 12C15N and 12C14N were imaged simultaneously in a single measurement to allow accurate ratio calculation. 197Au (green) and 12C14N (purple) are merged in the lowest panel.
